# Supplementary material for: Mechanochromic composite elastomers for additive manufacturing and low strain mechanophore activation
Source: Royal Society of Chemistry journal article supplement (doi:10.1039/c9py01053j), 2019-01-01
Supplement: c9py01053j1.pdf [file c9py01053j1.pdf]

## Supporting Information:

### Mechanochromic Composite Elastomers for Additive Manufacturing and Low Strain Mechanophore Activation

Rachel Rohde,<sup>a</sup> Amrita Basu,<sup>b</sup> Lillian B. Okello<sup>c</sup>, Meredith H. Barbee,<sup>a</sup> Orlin D. Velev,<sup>c</sup> Alshakim Nelson,<sup>b</sup> Stephen L. Craig<sup>a</sup>

<sup>a</sup> *Department of Chemistry, Duke University, Durham, NC 27708 [stephen.craig@duke.edu](mailto:stephen.craig@duke.edu).*

<sup>b</sup> *Department of Chemistry, University of Washington, Seattle, WA 98112 [alshakim@uw.edu](mailto:alshakim@uw.edu)*

<sup>c</sup> *Department of Chemical and Biomolecular Engineering, North Carolina State University, Raleigh, NC 27695*

*[odvelev@ncsu.edu](mailto:odvelev@ncsu.edu)*

## General Procedures:

1. **Synthetic Procedures:** Lab general solvents (dichloromethane, chloroform, hexane, ethyl acetate, acetone, xylene, tetrahydrofuran, ethanol) were purchased from VMR or Sigma Aldrich. Tween 20 and polyvinyl alcohol (Mowiol 18-88) were purchased from Sigma Aldrich. Sylgard®184 was purchased from Ellsworth Adhesives, Germantown, WI. Dragon Skin® 30 was purchased from Smooth-On. Flash chromatography was performed on CombiFlash®200 auto-column system from Teledyne ISCO.

### A. Synthesis of Spiropyran

Spiropyran was synthesized according to a previously reported procedure<sup>1</sup>.

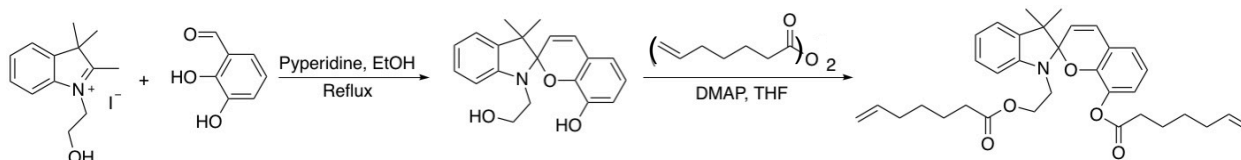

Scheme S1 - Synthetic scheme of spiropyran-diene.

2. **Molecular Characterizations:** Spiropyran was characterized on <sup>1</sup>H NMR spectra were collected on a 400 MHz Varian INOVA spectrometer and <sup>13</sup>C NMR spectra were collected on a 500 MHz Varian UNITY spectrometer.

3. **Tensile Testing:** Uniaxial tensile tests were performed on all specimens on a TA Instruments RSA III Dynamic Mechanical Analyzer (Force resolution: 1nm, strain resolution: 1nm) at Duke University's Shared Material Instrument Facility (SMIF). Composite materials were hand extruded. Dragon Skin films were cut to the approximate dimensions of the extruded material. To avoid slipping and to prevent force concentrating at clamp site, two pieces of thin PDMS film were placed between the specimen and clamp on both sides of the specimen.

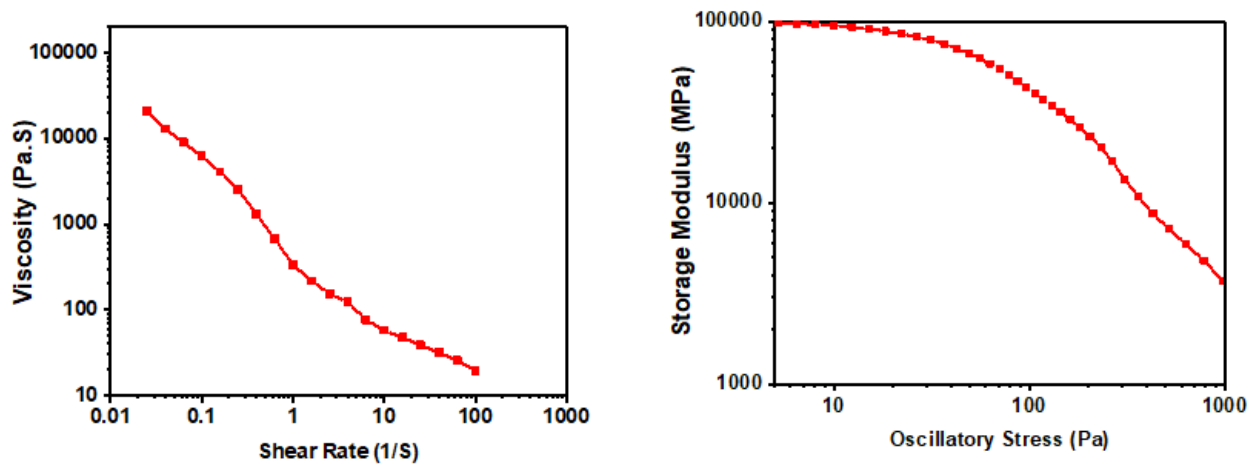

**Fig. S1:** Rheometrical characterization of mechanochromic ink (a) Viscosity versus shear rate experiment to demonstrate shear thinning nature of the ink. (b) Oscillatory stress ramp experiment demonstrating the yield stress behavior.

### Determining Mechanochromic Onset:

We first attempted to determine SP activation by taking images with a Canon EOS Rebel XSi camera at random intervals during a continuous quasi-static uniaxial tensile experiment. The image was white balanced with a color card before being imported in Fiji/ImageJ. A region of interest (ROI) was selected and its approximate position was maintained across all images and color channels. The results from the experiment suggested strain-dependent diffraction (Figure - S1). This was confirmed by repeating the procedure in analyzing color onset in composite materials without SP (Figure – S2).

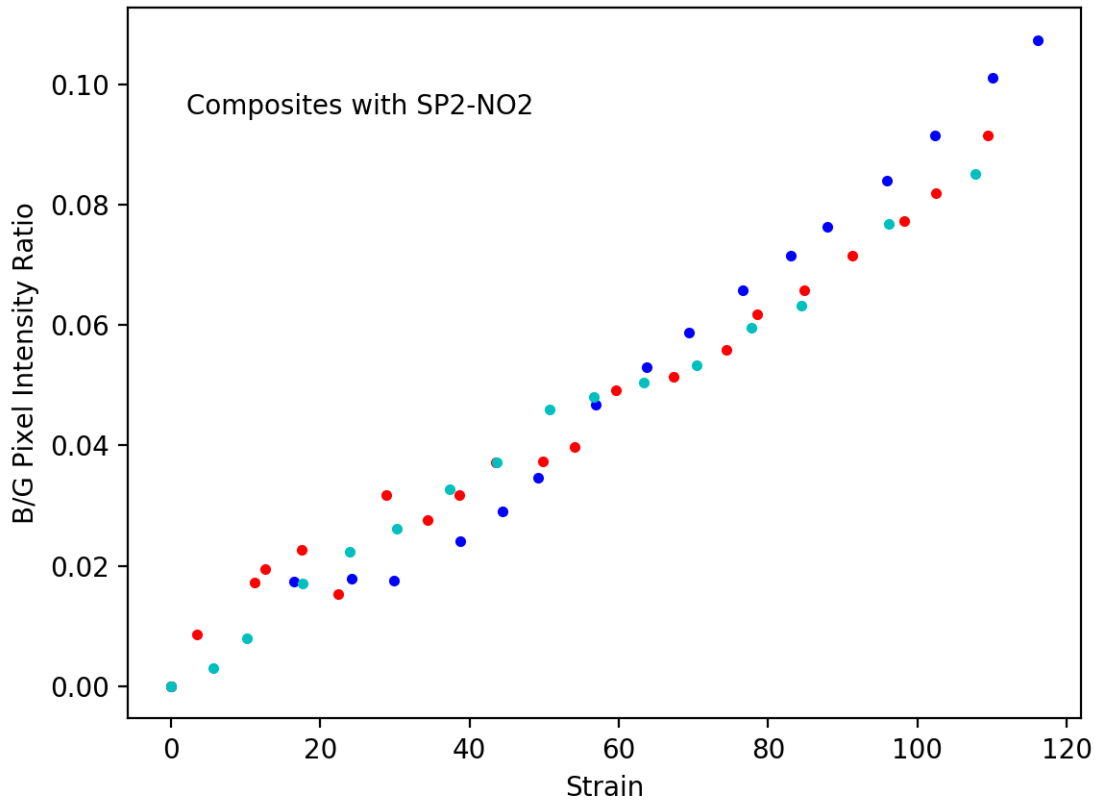

**Fig. S2:** Results from continuous uniaxial tension tensile experiment of extruded composite materials containing SP. The ratio of the intensities of the blue channel to the green channels are plotted above.

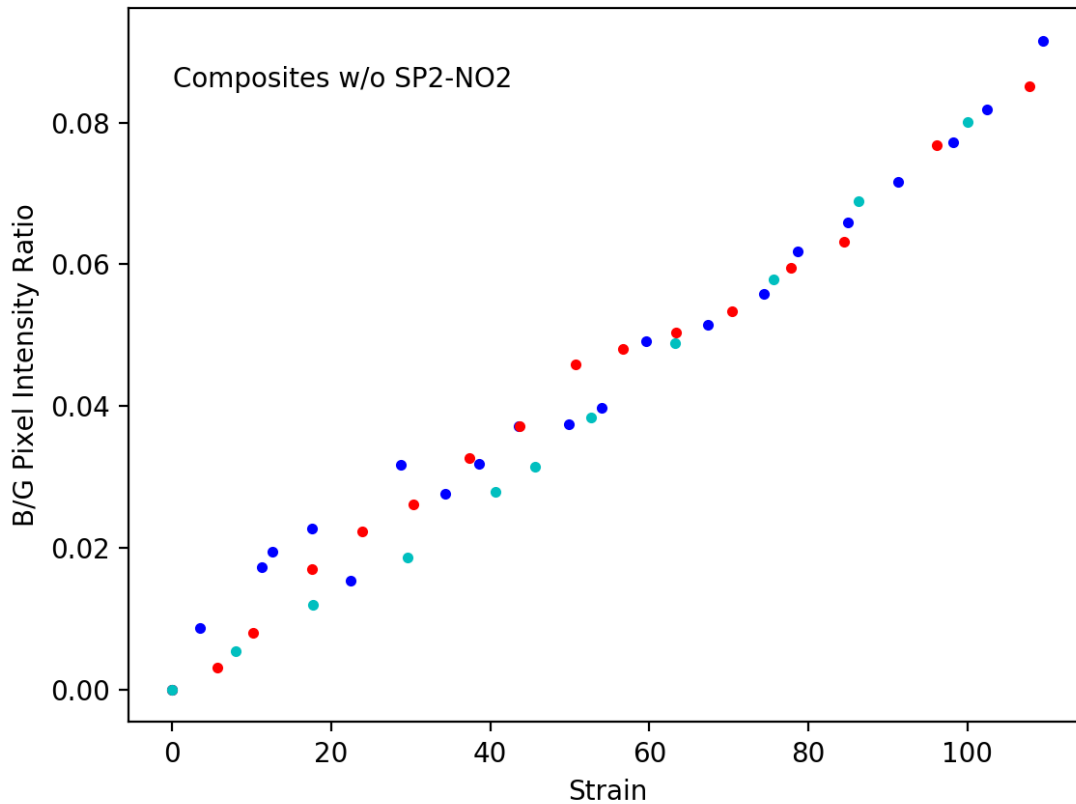

**Figure S3:** Three extruded composite material without mechanophore. Images were taken at random intervals during continuous quasi-static uniaxial tensile test.

**“Zero-Percent” Strain Test:**

The previously described experiment was modified to reduce diffraction interference. Instead of continuously straining the specimens until failure, the was stretched to the strain of interest and an image was captured with Canon EOS Rebel XSi. This image was used to confirm strains. The specimen was immediately returned to zero percent strain and another image was taken (Figures S3-S5) . An ROI was selected from the image taken at zero-percent strain and maintained across all color channels and zero strain images. Color ratios were measured from these ROIs with the method described above. The strains measured from the previous image correspond to the B/G measured in zero-strain image that followed (Figure S6). This modified experiment produced data more similar to previously measured mechanochromic onset data from our group<sup>1-3</sup>.

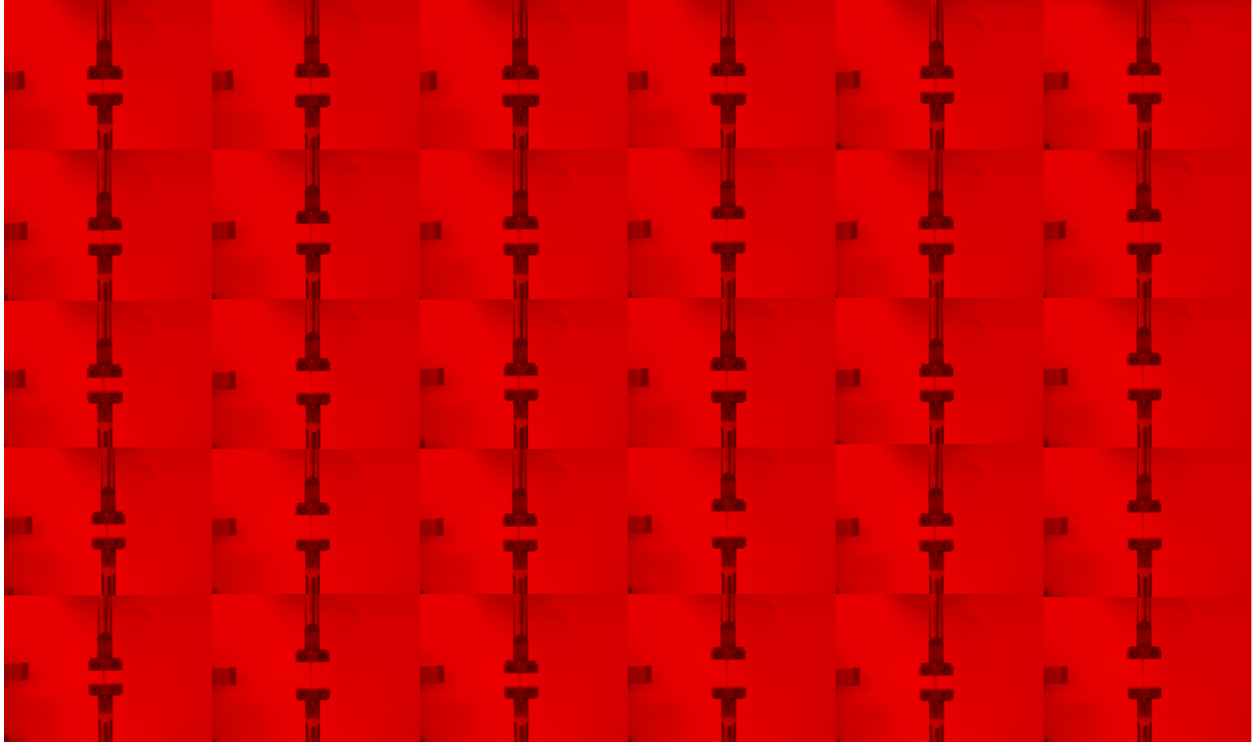

**Figure S4:** Representative image montage of extruded composite material during the zero-strain experiment in the red channel.

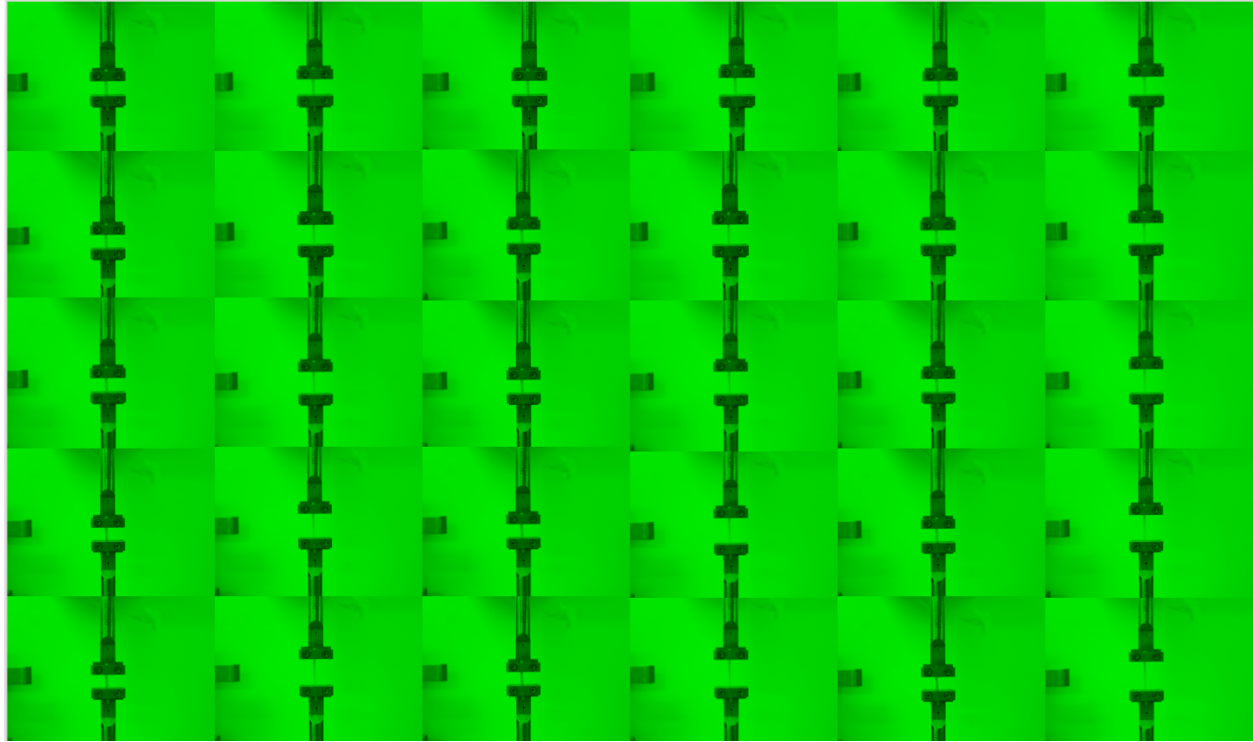

**Figure S5:** Representative image montage of extruded composite material during the zero-strain experiment in the green channel.

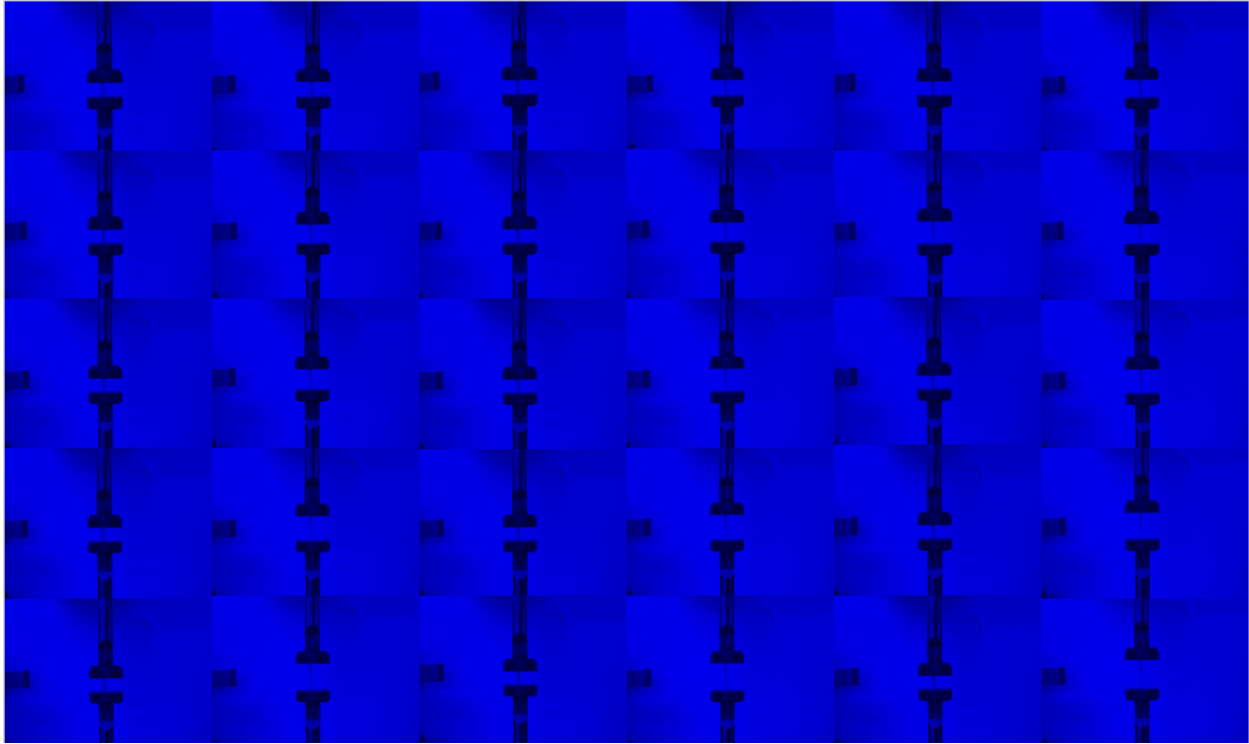

**Figure S6:** Representative image montage of extruded composite material during the zero-strain experiment in the blue channel.

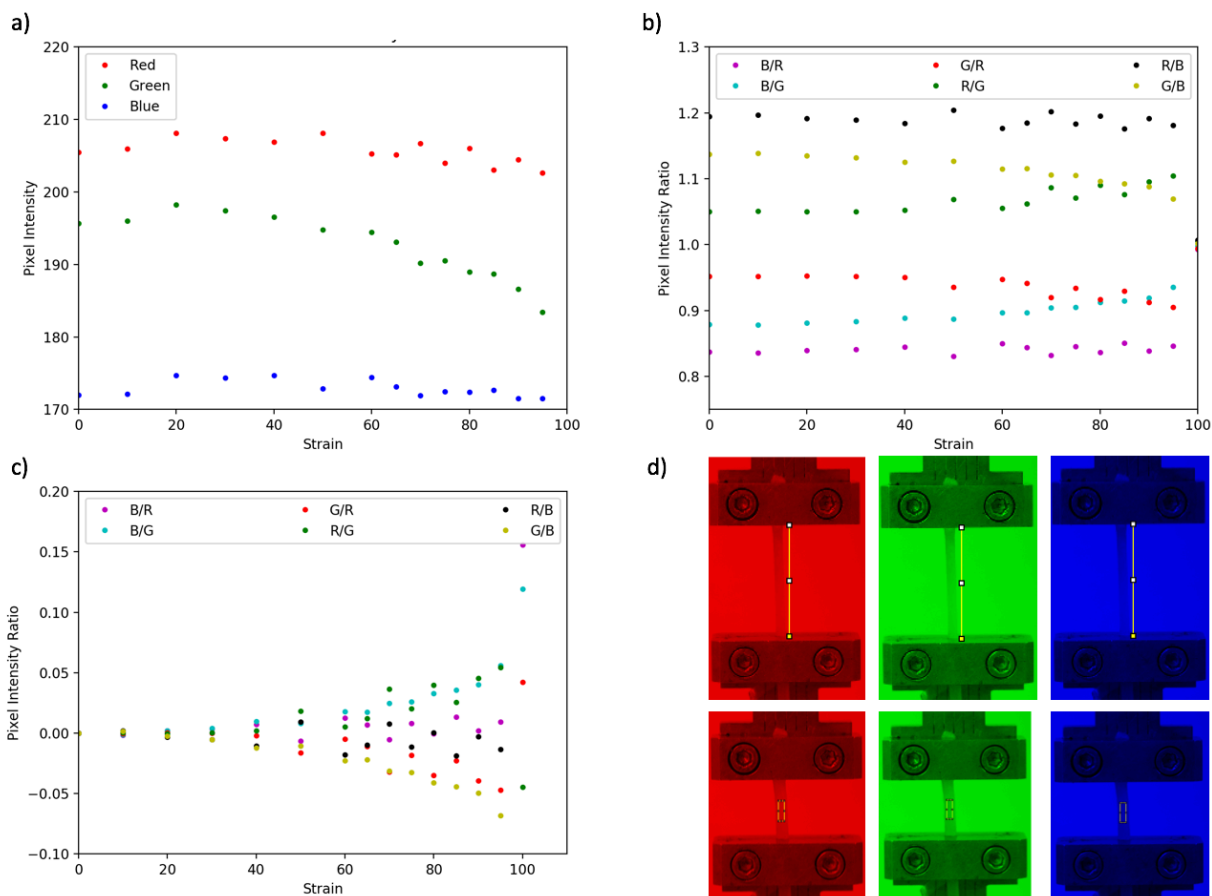

**Figure S7:** Change in channels as a function of strain. (a) Raw pixel intensities at red, green and blue channels; (b) All possible pixel intensity ratios; (c) All normalized pixel intensity ratios (e.g.  $B/G_{ratio} - B/G_{initial}$ ) (d) Representative image of ImageJ analysis. Strains were determined by the pixel length of strained composite and intensities were taken from rectangular ROI of the corresponding zero-percent strain in red, green and blue channels.



| Strain | R       | G       | B       |
|--------|---------|---------|---------|
| 0      | 205.486 | 195.646 | 172.022 |
| 10     | 205.941 | 196.006 | 172.102 |
| 20     | 208.120 | 198.212 | 174.683 |
| 30     | 207.357 | 197.388 | 174.338 |
| 40     | 206.895 | 196.572 | 174.726 |
| 50     | 208.119 | 194.753 | 172.857 |
| 60     | 205.262 | 194.451 | 174.427 |
| 65     | 205.148 | 193.104 | 173.129 |
| 70     | 206.671 | 190.164 | 171.927 |
| 75     | 204.000 | 190.520 | 172.435 |
| 80     | 206.005 | 188.973 | 172.391 |
| 85     | 203.040 | 188.728 | 172.685 |
| 90     | 204.423 | 186.591 | 171.529 |
| 95     | 202.624 | 183.400 | 171.520 |
| 100    | 226.180 | 224.928 | 224.562 |

**Table S1:** Representative red (R), green (G) and blue (B) pixel intensities at various strains.

| Strain | B/R      | B/G      | G/R      | R/G     | R/B     | G/B     |
|--------|----------|----------|----------|---------|---------|---------|
| 0      | 0.837147 | 0.879251 | 0.952114 | 1.05029 | 1.19453 | 1.13733 |
| 10     | 0.835686 | 0.878045 | 0.951758 | 1.05069 | 1.19662 | 1.13889 |
| 20     | 0.839338 | 0.881294 | 0.952393 | 1.04999 | 1.19142 | 1.13470 |
| 30     | 0.840763 | 0.883225 | 0.951923 | 1.05050 | 1.18940 | 1.13221 |
| 40     | 0.844515 | 0.888865 | 0.950105 | 1.05252 | 1.18411 | 1.12503 |
| 50     | 0.830568 | 0.887570 | 0.935777 | 1.06863 | 1.20400 | 1.12667 |
| 60     | 0.849777 | 0.897023 | 0.947331 | 1.05560 | 1.17678 | 1.11480 |
| 65     | 0.843922 | 0.896558 | 0.941291 | 1.06237 | 1.18494 | 1.11538 |
| 70     | 0.831887 | 0.904099 | 0.920129 | 1.08680 | 1.20209 | 1.10607 |
| 75     | 0.845270 | 0.905076 | 0.933922 | 1.07075 | 1.18305 | 1.10488 |
| 80     | 0.836829 | 0.912252 | 0.917322 | 1.09013 | 1.19499 | 1.09619 |
| 85     | 0.850497 | 0.914994 | 0.929511 | 1.07583 | 1.17578 | 1.09290 |
| 90     | 0.839089 | 0.919278 | 0.912769 | 1.09557 | 1.19177 | 1.08781 |
| 95     | 0.846494 | 0.935224 | 0.905125 | 1.10482 | 1.18134 | 1.06926 |
| 100    | 0.992846 | 0.998373 | 0.994465 | 1.00557 | 1.00721 | 1.00163 |

**Table S2:** All pixel intensity ratios from representative specimen at various strains.

| <i>Strain</i> | <i>D B/R</i> | <i>D B/G</i> | <i>D G/R</i> | <i>D R/G</i> | <i>D R/B</i> | <i>D G/B</i> |
|---------------|--------------|--------------|--------------|--------------|--------------|--------------|
| 0             | 0.000000     | 0.000000     | 0.000000     | 0.00000      | 0.00000      | 0.00000      |
| 10            | -0.001461    | -0.001207    | -0.000355    | 0.00039      | 0.00209      | 0.00156      |
| 20            | 0.002191     | 0.002042     | 0.000279     | -0.00031     | -0.00312     | -0.00264     |
| 30            | 0.003615     | 0.003974     | -0.000190    | 0.00021      | -0.00514     | -0.00512     |
| 40            | 0.007368     | 0.009614     | -0.002008    | 0.00222      | -0.01042     | -0.01230     |
| 50            | -0.006579    | 0.008319     | -0.016336    | 0.01834      | 0.00946      | -0.01066     |
| 60            | 0.012630     | 0.017772     | -0.004783    | 0.00530      | -0.01775     | -0.02253     |
| 65            | 0.006775     | 0.017307     | -0.010822    | 0.01208      | -0.00959     | -0.02195     |
| 70            | -0.005260    | 0.024847     | -0.031984    | 0.03651      | 0.00755      | -0.03126     |
| 75            | 0.008123     | 0.025824     | -0.018192    | 0.02046      | -0.01148     | -0.03245     |
| 80            | -0.000318    | 0.033001     | -0.034791    | 0.03983      | 0.00045      | -0.04114     |
| 85            | 0.013350     | 0.035743     | -0.022602    | 0.02554      | -0.01875     | -0.04443     |
| 90            | 0.001942     | 0.040027     | -0.039344    | 0.04527      | -0.00276     | -0.04952     |
| 95            | 0.009347     | 0.055972     | -0.046989    | 0.05453      | -0.01319     | -0.06807     |
| 100           | 0.155699     | 0.119122     | 0.042351     | -0.04473     | -0.18733     | -0.13570     |

**Table S3:** All normalized pixel intensity ratio (e.g.  $B/R_{\text{ratio}} - B/R_{\text{initial}}$ ) for a representative specimen.

| <i>Strain</i> | <i>Test 1</i> | <i>Test 2</i> | <i>Test 3</i> | <i>Test 4</i> | <i>Test 5</i> | <i>Average</i> |
|---------------|---------------|---------------|---------------|---------------|---------------|----------------|
| 0             | 0.00000       | 0.00000       | 0.00000       | 0.00000       | 0.00000       | 0.00000        |
| 10            | -0.00121      | 0.00345       | -0.00085      | -0.00398      | 0.00057       | -0.00040       |
| 20            | 0.00204       | 0.00228       | -0.00222      | -0.00010      | -0.00200      | 0.00000        |
| 30            | 0.00397       | 0.00901       | -0.00120      | 0.00064       | -0.00154      | 0.00218        |
| 40            | 0.00961       | 0.00886       | 0.00304       | 0.00176       | 0.00008       | 0.00467        |
| 50            | 0.00832       | 0.01251       | 0.00522       | 0.00141       | 0.00242       | 0.00598        |
| 60            | 0.01777       | 0.01811       | 0.01452       | 0.00279       | 0.00155       | 0.01095        |
| 65            | 0.01731       | 0.02204       | 0.01875       | 0.01151       | 0.00597       | 0.01512        |
| 70            | 0.02485       | 0.02102       | 0.02191       | 0.01452       | 0.00538       | 0.01754        |
| 75            | 0.02582       | 0.03171       | 0.02664       | 0.01944       | 0.02747       | 0.02622        |
| 80            | 0.03300       | 0.03320       | 0.04799       | 0.02186       | 0.01465       | 0.03014        |
| 85            | 0.03574       | 0.03923       | 0.05015       | 0.02361       | 0.01955       | 0.03366        |
| 90            | 0.04003       | 0.04420       | 0.04697       | 0.02178       | 0.01855       | 0.03431        |

**Table S4:** Normalized B/G pixel intensity ratios for all tested specimens.

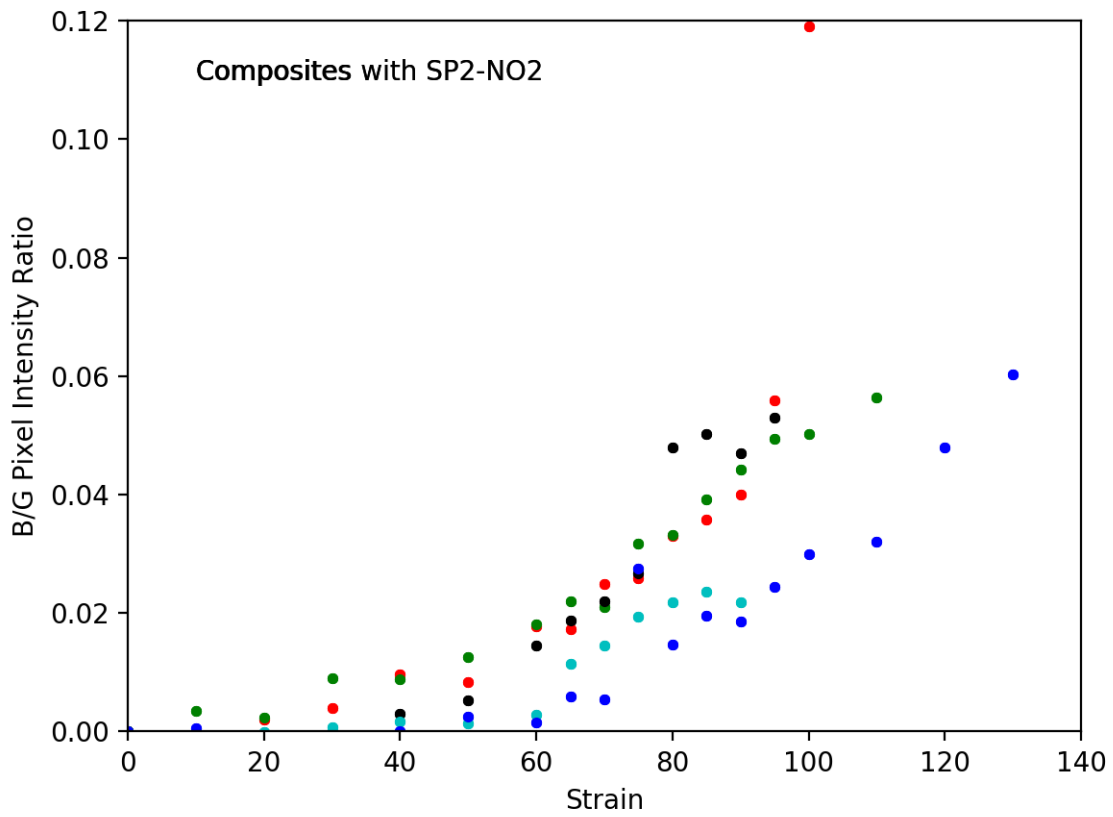

**Figure S8:** Figure of normalized B/G pixel intensity ratio for all tested specimens

a)

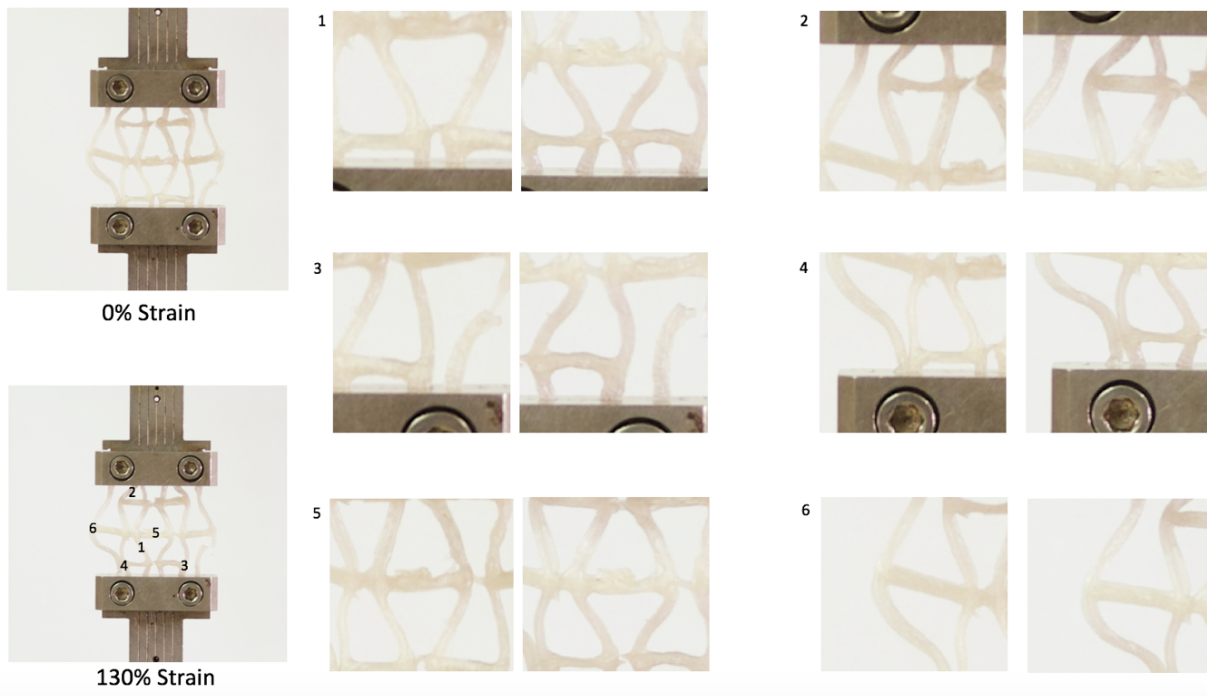

b)

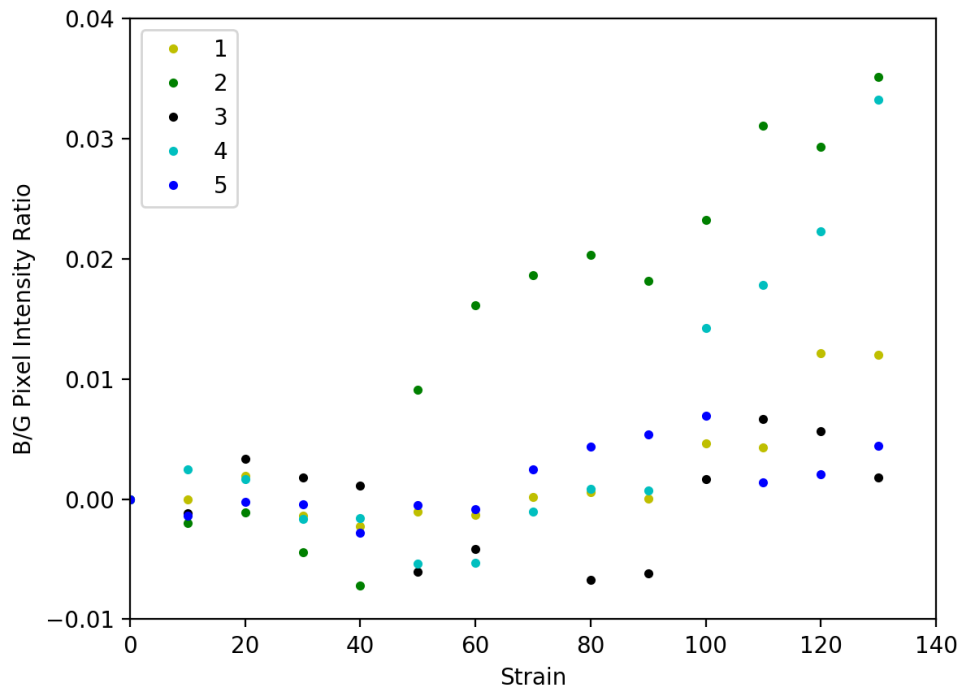

**Fig. S9:** 3D printed mesh like structures showing activation under tensile forces. **(a)** pictures of regionalized activation in mesh structures. **(b)** B/G Pixel Intensity Ratio of areas selected above. Mechanochromic activation appears to be most significant in areas close to the clamp.

- 1 M. H. Barbee, T. Kouznetsova, S. L. Barrett, G. R. Gossweiler, Y. Lin, S. K. Rastogi, W. J. Brittain and S. L. Craig, *J. Am. Chem. Soc.*, 2018, **140**, 12746–12750.
